# Supplementary material for: Ethnobotanical Survey of Plants Used by Subsistence Farmers in Mitigating Cabbage and Spinach Diseases in OR Tambo Municipality, South Africa
Source: MDPI journal article supplement (doi:10.3390/plants11233215), 2022-11-24
Supplement: s1 [file s1]

**Table S1.** Pictures of common diseases affecting cabbage and spinach in Eastern Cape, South Africa.

| CABBAGE DISEASES                                                                                           |                                                                                                                  |
|------------------------------------------------------------------------------------------------------------|------------------------------------------------------------------------------------------------------------------|
| <br>Sclerotinia = C1      | <br>Ring spot = C2             |
| <br>Fusarium wilt = C3    | <br>Downy Mildew = C4          |
| <br>Powdery Mildew = C5  | <br>Alternaria leaf spot = C6 |
| <br>Bacterial spot = C7 |                                                                                                                  |

C8= Root rot

C9 = Black rot

## SPINACH DISEASES

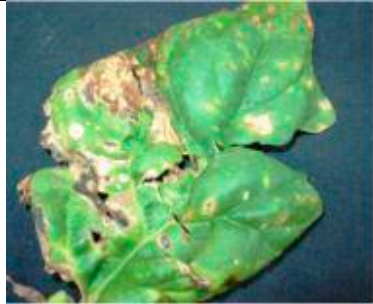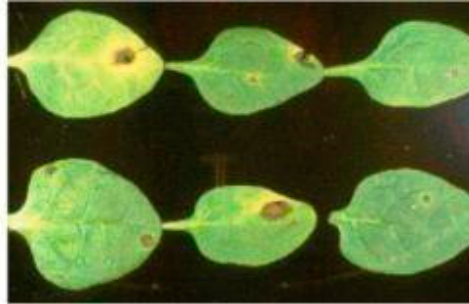

Anthracnose = S1

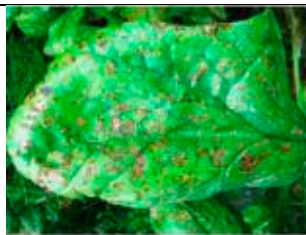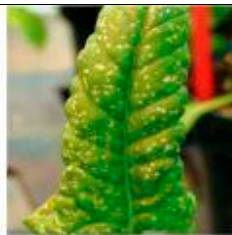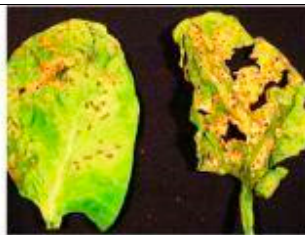

Cladosporium leaf spot = S2

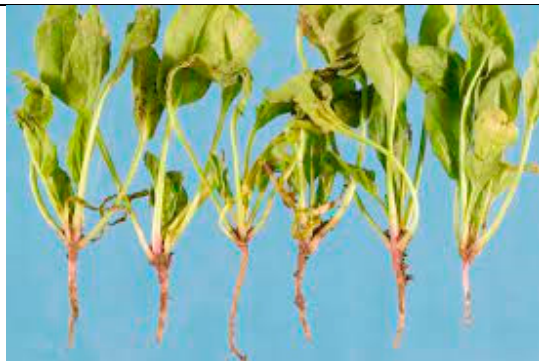

Damping off and root rot = S3

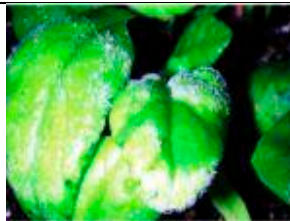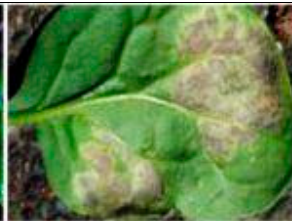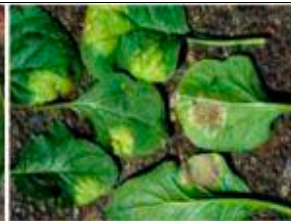

Downy mildew = S4

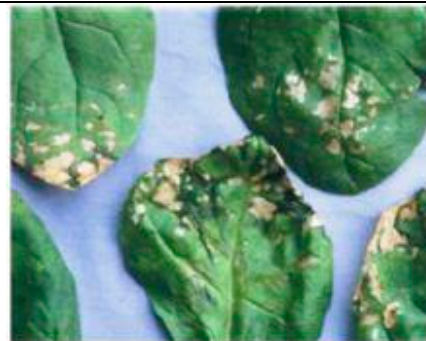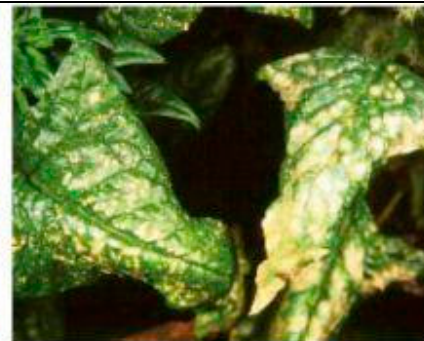

Stemphylium leaf spot = S5
